# Supplementary material for: PEGylated gold nanoprisms for photothermal therapy at low laser power density
Source: Royal Society of Chemistry journal article supplement (doi:10.1039/c5ra17385j), 2015-01-01
Supplement: c5ra17385j1.pdf [file c5ra17385j1.pdf]

## Supporting Information

### PEGylated Gold Nanoprisms for Photothermal Therapy at Low Laser Power Density

Xingqun Ma,<sup>a</sup> Yuan Cheng,<sup>a</sup> Yong Huang,<sup>a</sup> Ying Tian,<sup>b</sup> Shouju Wang<sup>\*b</sup> and Yingxia Chen<sup>\*a</sup>

a. PLA Cancer Center of Nanjing Bayi Hospital, Nanjing 210002, China

b. Department of Medical Imaging, Jinling Hospital, School of Medicine, Nanjing University, Nanjing 210002, China

\*Corresponding authors:

Yingxia Chen, M.D.

PLA Cancer Center of Nanjing Bayi Hospital, Nanjing 210002, China

E-mail: [chenyingxiacsco@163.com](mailto:chenyingxiacsco@163.com)

Shouju Wang, M.D.

Department of Medical Imaging, Jinling Hospital, School of Medicine, Nanjing University, Nanjing 210002, China

E-mail: [shouju.wang@gmail.com](mailto:shouju.wang@gmail.com)

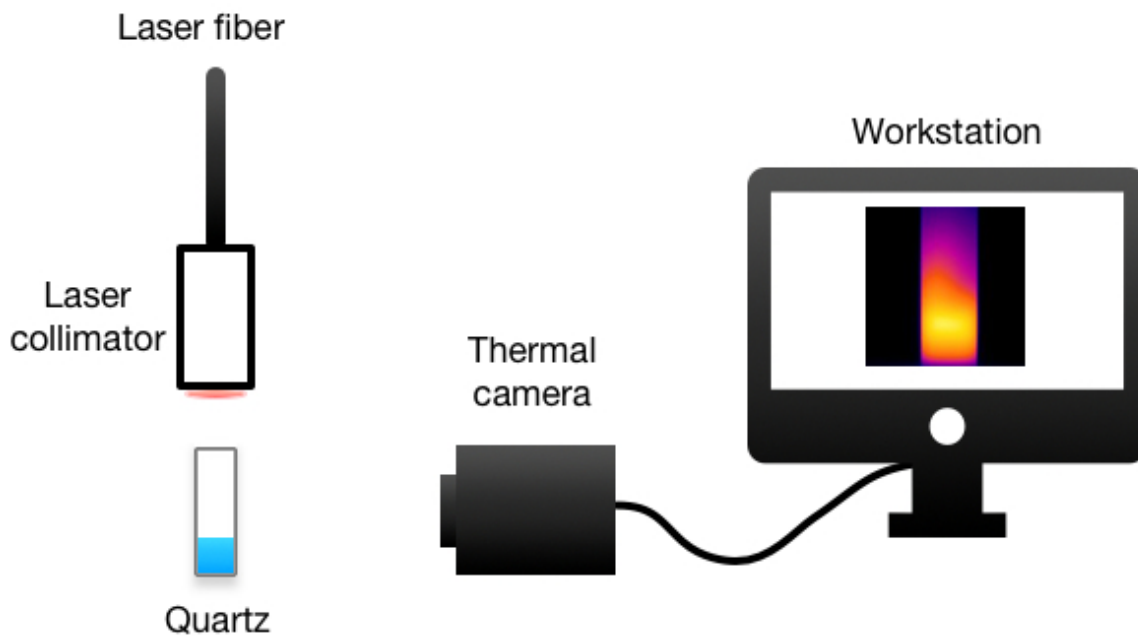

Figure S1. A schematic representation of the laser setup and temperature measurement. The volume of GNPs solutions is 1 mL. The wavelength and power density of the laser is  $650 \pm 10$  nm and  $2 \text{ W cm}^{-2}$ .

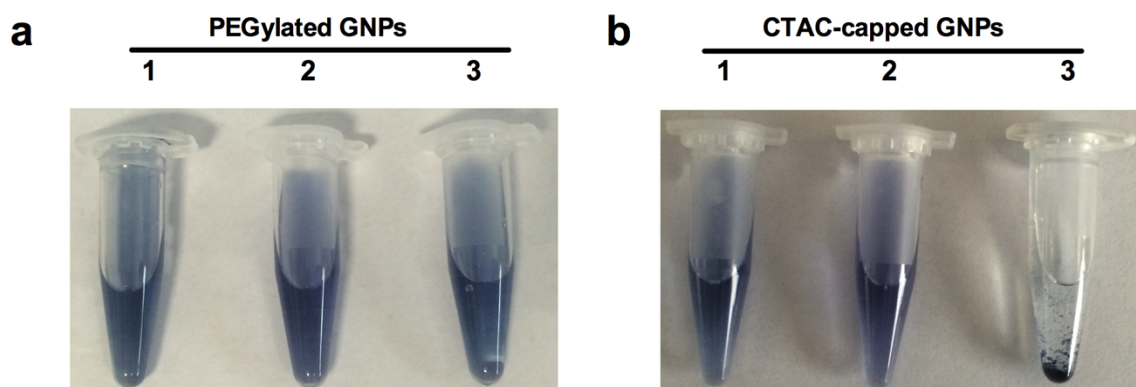

Figure S2. (a) Digital photos of PEGylated GNPs dispersed in (1) water, (2) PBS, (3) DMEM without phenol red after 24 h. (b) Digital photos of CTAC-capped GNPs dispersed in (1) water, (2) PBS, (3) DMEM without phenol red after 24 h.

Table S1. Photothermal conversion efficacy of GNPs comparing with other types of gold nanostructures.

| Gold nanostructures | Photothermal conversion efficacy | Reference  |
|---------------------|----------------------------------|------------|
| Gold nanorods       | 22%                              | [15]       |
| Gold nanoshells     | 13%                              | [24]       |
| Gold nanocages      | 63%                              | [25]       |
| Gold hexapods       | 29.6%                            | [25]       |
| Gold bellflowers    | 74%                              | [3]        |
| Gold nanoprisms     | 70%                              | This study |
